# Supplementary material for: Investigating Mental Rehearsal's Applicability in Guiding Independent E-learning of Eye Examination Skills During the Pandemic – Part II (IMAGINE-II)
Source: Research Square preprint supplement (doi:10.21203/rs.3.rs-6314150/v1), 2025-06-13
Supplement: Supplementary file 1 [file 9ff534f6871c7e0427575f43.docx]

**Annex 1: Script for Running Commentary of Pre-Recorded Guided Mental Rehearsal of Pupillary Examination on a Normal Patient**

- Introduce yourself to the patient and ask for permission to perform the examination.
- Keep the room lights on to check for the pupils in the light.
- Ask the patient to look far at a distant target such as a clock of fixation target.
- Illuminate both pupils evenly with a torch placed below the nose at about half an arm’s length distance.
- Assess both pupil sizes in light and look for anisocoria (different pupil sizes) in the light.
- Turn the room lights off to check for the pupils in the dark
- Illuminate both pupils evenly with a torch placed below the nose to look for anisocoria in the dark.
- Determine whether the anisocoria is worse in the light (due to a defect in pupil constriction or para-sympathetic pathway); or worse in the dark (due to a defect in pupil dilation or sympathetic pathway).
- Now we perform a direct light reflex
- Shine the light into the right pupil from below to avoid causing accommodation.
- Look for constriction of the test eye.
- Note the speed of pupil constriction (whether is it brisk or sluggish) and the amount of pupil constriction (absent or constricted to a particular size).
- Repeat the same steps for the other pupil.
- To perform the consensual light reflex, 2 torchlights will be required.
- One to illuminate the fellow pupil from below to constrict.
- The other to indirectly illuminate from the temporal side to observe for the reaction of the test pupil.
- The test pupil should constrict simultaneously with the same amplitude as the illuminated fellow pupil.
- Now we check for relative afferent pupillary defect (RAPD in short).
- Remind the patient to continue fixating at a distant target. The room lights are still off.
- Shine a bright torch light starting from below the nose into the right pupil for 3 seconds.
- Count mentally “one a thousand, two a thousand, three a thousand”.
- Note the illuminated pupil to constrict briskly if normal.
- Then rapidly swing the light across the nose bridge to shine onto the left pupil for 3 seconds.
- Look for dilation of the test pupil. Depending on severity, it may constrict or remain static then dilate or dilate immediately.
- Repeat this test on the same pupil to re-confirm the findings if necessary.
- If there is no RAPD, repeat this test on the left pupil then swing over to the right pupil to check for RAPD.
- Now we check for light-near dissociation.
- Ask the patient to look far at a distant target such as a clock or fixation target.
- Ask the patient to adopt a left thumbs up gesture at eye level to function as a near target.
- Shine a torch from below the chin about half an arm’s length to evenly illuminate both pupils.
- Note the size of test pupil with distant fixation.
- Now ask the patient then to look at the tip of his left thumb (the near target).
- Look for constriction of the test pupil due to the near response.

# Annex 2: Movement Imagery Questionnaire-3 (MIQ-3)

## Full Questionnaire With Instructions

Instructions

This questionnaire concerns two ways of *mentally* performing movements which are used by some people more than by others, and are more applicable to some types of movements than others. The first is attempting to form a visual image or picture of a movement in your mind. The second is attempting to feel what performing a movement is like without actually doing the movement. You are requested to do both of these mental tasks for a variety of movements in this questionnaire, and then rate how easy/difficult you found the tasks to be. The ratings that you give are not designed to assess the goodness or badness of the way you perform these mental tasks. They are attempts to discover the capacity individuals’ show for performing these tasks for different movements. There are no right or wrong ratings or some ratings that are better than others.

Each of the following statements describes a particular action or movement. Read each statement carefully and then actually perform the movement as described. Only perform the movement a single time. Return to the starting position for the movement just as if you were going to perform the action a second time. Then depending on which of the following you are asked to do, either (1) form as clear and vivid a visual image as possible of the movement just performed from an internal perspective (i.e., from a 1st person perspective, as if you are actually inside yourself performing and seeing the action through your own eyes), (2) form as clear and vivid a visual image as possible of the movement just performed from an external perspective (i.e., from a 3rd person perspective, as if watching yourself on DVD), or (3) attempt to feel yourself making the movement just performed without actually doing it.

After you have completed the mental task required, rate the ease/difficulty with which you were able to do the task. Take your rating from the following scale. Be as accurate as possible and take as long as you feel necessary to arrive at the proper rating for each movement. You may choose the same rating for any number of movements “seen” or “felt” and it is not necessary to utilize the entire length of the scale.

## Rating Scales

### Visual Imagery Scale

| **1** | **2** | **3** | **4** | **5** | **6** | **7** |
| --- | --- | --- | --- | --- | --- | --- |
| Very hard to see | Hard to see | Somewhat hard to see | Neutral (not easy nor hard) | Somewhat easy to see | Easy to see | Very easy to see |

### Kinaesthetic Imagery Scale

| **1** | **2** | **3** | **4** | **5** | **6** | **7** |
| --- | --- | --- | --- | --- | --- | --- |
| Very hard to feel | Hard to feel | Somewhat hard to feel | Neutral (not easy nor hard) | Somewhat easy to feel | Easy to feel | Very easy to feel |

| 1. | STARTING POSITION: | Stand with your feet and legs together and your arms at your sides. |
| --- | --- | --- |
|  |  |  |
|  | ACTION: | Raise your right knee as high as possible so that you are starting on your left leg with your right leg flexed (bent) at the knee. Now lower your right leg so you are once again standing on two feet. The action is performed slowly. |
|  |  |  |
|  | MENTAL TASK: | Assume the starting position. Attempt to feel yourself making the movement just observed without actually doing it. Now rate the ease/difficulty with which you were able to do this mental task. |
|  |  |  |
|  | Rating: __________ |  |
|  |  |  |
|  |  |  |
| 2. | STARTING POSITION: | Stand with your feet and legs together and your arms at your sides. |
|  |  |  |
|  | ACTION: | Bend down low and then jump straight up in the air as high as possible with both arms extended above your head. Land with both feet apart and lower your arms to your sides. |
|  |  |  |
|  | MENTAL TASK: | Assume the starting position. Attempt to see yourself making the movement just observed from an internal perspective. Now rate the ease/difficulty with which you were able to do this mental task. |
|  |  |  |
|  | Rating: __________ |  |
|  |  |  |

| 3. | STARTING POSITION: | Extend the arm of your non-dominant hand straight out to your side so that it is parallel to the ground, palm down. |
| --- | --- | --- |
|  |  |  |
|  | ACTION: | Move your arm forward until it is directly in front of your body (still parallel to the ground). Keep your arm extended during the movement, and make the movement slowly. |
|  |  |  |
|  | MENTAL TASK: | Assume the starting position. Attempt to see yourself making the movement just observed from an external perspective. Now rate the ease/difficulty with which you were able to do this mental task and the angle the image was observed from (see additional sheet provided for full list of different angles). |
|  |  |  |
|  | Rating: __________ |  |
|  |  |  |
|  |  |  |
| 4. | STARTING POSITION: | Stand with your feet slightly apart and your arms fully extended above your head. |
|  |  |  |
|  | ACTION: | Slowly bend forward at the waist and try and touch your toes with your fingertips (or, if possible, touch the floor with your fingertips or your hands). Now return to the starting position, standing erect with your arms extended above your head. |
|  |  |  |
|  | MENTAL TASK: | Assume the starting position. Attempt to feel yourself making the movement just observed without actually doing it. Now rate the ease/difficulty with which you were able to do this mental task. |
|  |  |  |
|  | Rating: __________ |  |
|  |  |  |

| 5. | STARTING POSITION: | Stand with your feet and legs together and your arms at your sides. |
| --- | --- | --- |
|  |  |  |
|  | ACTION: | Raise your right knee as high as possible so that you are starting on your left leg with your right leg flexed (bent) at the knee. Now lower your right leg so you are once again standing on two feet. The action is performed slowly. |
|  |  |  |
|  | MENTAL TASK: | Assume the starting position. Attempt to see yourself making the movement just observed from an internal perspective. Now rate the ease/difficulty with which you were able to do this mental task. |
|  |  |  |
|  | Rating: __________ |  |
|  |  |  |
|  |  |  |
| 6. | STARTING POSITION: | Stand with your feet and legs together and your arms at your sides. |
|  |  |  |
|  | ACTION: | Bend down low and then jump straight up in the air as high as possible with both arms extended above your head. Land with both feet apart and lower your arms to your sides. |
|  |  |  |
|  | MENTAL TASK: | Assume the starting position. Attempt to see yourself making the movement just observed from an external perspective. Now rate the ease/difficulty with which you were able to do this mental task and the angle the image was observed from (see additional sheet provided for full list of different angles). |
|  |  |  |
|  | Rating: __________ |  |
|  |  |  |

| 7. | STARTING POSITION: | Extend the arm of your non-dominant hand straight out to your side so that it is parallel to the ground, palm down. |
| --- | --- | --- |
|  |  |  |
|  | ACTION: | Move your arm forward until it is directly in front of your body (still parallel to the ground). Keep your arm extended during the movement, and make the movement slowly. |
|  |  |  |
|  | MENTAL TASK: | Assume the starting position. Attempt to feel yourself making the movement just performed without actually doing it. Now rate the ease/difficulty with which you were able to do this mental task. |
|  |  |  |
|  | Rating: __________ |  |
|  |  |  |
|  |  |  |
| 8. | STARTING POSITION: | Stand with your feet slightly apart and your arms fully extended above your head. |
|  |  |  |
|  | ACTION: | Slowly bend forward at the waist and try and touch your toes with your fingertips (or, if possible, touch the floor with your fingertips or your hands). Now return to the starting position, standing erect with your arms extended above your head. |
|  |  |  |
|  | MENTAL TASK: | Assume the starting position. Attempt to see yourself making the movement just observed from an internal perspective. Now rate the ease/difficulty with which you were able to do this mental task. |
|  |  |  |
|  | Rating: __________ |  |
|  |  |  |

| 9. | STARTING POSITION: | Stand with your feet and legs together and your arms at your sides. |
| --- | --- | --- |
|  |  |  |
|  | ACTION: | Raise your right knee as high as possible so that you are starting on your left leg with your right leg flexed (bent) at the knee. Now lower your right leg so you are once again standing on two feet. The action is performed slowly. |
|  |  |  |
|  | MENTAL TASK: | Assume the starting position. Attempt to see yourself making the movement just observed from an external perspective. Now rate the ease/difficulty with which you were able to do this mental task and the angle the image was observed from (see additional sheet provided for full list of different angles). |
|  |  |  |
|  | Rating: __________ |  |
|  |  |  |
|  |  |  |
| 10. | STARTING POSITION: | Stand with your feet and legs together and your arms at your sides. |
|  |  |  |
|  | ACTION: | Bend down low and then jump straight up in the air as high as possible with both arms extended above your head. Land with both feet apart and lower your arms to your sides. |
|  |  |  |
|  | MENTAL TASK: | Assume the starting position. Attempt to feel yourself making the movement just performed without actually doing it. Now rate the ease/difficulty with which you were able to do this mental task. |
|  |  |  |
|  | Rating: __________ |  |
|  |  |  |

| 11. | STARTING POSITION: | Extend the arm of your non-dominant hand straight out to your side so that it is parallel to the ground, palm down. |
| --- | --- | --- |
|  |  |  |
|  | ACTION: | Move your arm forward until it is directly in front of your body (still parallel to the ground). Keep your arm extended during the movement, and make the movement slowly. |
|  |  |  |
|  | MENTAL TASK: | Assume the starting position. Attempt to see yourself making the movement just observed from an internal perspective. Now rate the ease/difficulty with which you were able to do this mental task. |
|  |  |  |
|  | Rating: __________ |  |
|  |  |  |
|  |  |  |
| 12. | STARTING POSITION: | Stand with your feet slightly apart and your arms  fully extended above your head. |
|  |  |  |
|  | ACTION: | Slowly bend forward at the waist and try and touch your toes with your fingertips (or, if possible, touch the floor with your fingertips or your hands). Now return to the starting position, standing erect with your arms extended above your head. |
|  |  |  |
|  | MENTAL TASK: | Assume the starting position. Attempt to see yourself making the movement just observed from an external perspective. Now rate the ease/difficulty with which you were able to do this mental task and the angle the image was observed from (see additional sheet provided for full list of different angles). |
|  |  |  |
|  | Rating: __________ |  |

# Annex 3: Marking Scheme for Clinical Evaluation Exercise (CEX)

Pupillary Examination Micro-CEX Checklist

Name: ________________________________________________________________

Total score: _____ / 50

Please circle the mark in the corresponding boxes.

Unprofessional behaviour (rude, causing patient discomfort) constitutes immediate failure.

| **Category** | **Marking Point** | **Mark** | | | | | |
| --- | --- | --- | --- | --- | --- | --- | --- |
| **Starting the examination** | Introduces self and obtains consent. | 0 | | | 1 | | |
| Examines from patient’s right. | 0 | | | 1 | | |
| Asks patient to fixate on a distant target. | 0 | | | 1 | | |
|  | | | | | | | |
| **Anisocoria in light** | Shines light from below. | 0 | | | 1 | | |
| Does not cause accommodation. | 0 | | | 1 | | |
| Evenly illuminates both pupils. | 0 | | | 1 | | |
| Measures left pupil size | 0 | | | 1 | | |
| Measures right pupil size | 0 | | | 1 | | |
|  | | | | | | | |
| **Anisocoria in dark** | Offers to dim room lights. | 0 | | | 1 | | |
| Shines light from below. | 0 | | | 1 | | |
| Does not cause accommodation. | 0 | | | 1 | | |
| Evenly illuminates both pupils. | 0 | | | 1 | | |
| Measures left pupil size | 0 | | | 1 | | |
| Measures right pupil size | 0 | | | 1 | | |
|  | | | | | | | |
|  | | Right Eye | |  | | Left Eye | |
| **Direct light reflex** | Shines light onto test pupil from below. | 0 | 1 | 0 | 1 |
| Does not cause accommodation. | 0 | 1 | 0 | 1 |
| Elicits miosis. | 0 | 1 | 0 | 1 |
|  | | | | | | | |
|  | | Right Eye | |  | | Left Eye | |
| **Consensual light reflex** | Illuminates test pupil temporally. | 0 | 1 | 0 | 1 |
| Shines light onto non-test pupil from below. | 0 | 1 | 0 | 1 |
| Does not cause accommodation. | 0 | 1 | 0 | 1 |
| Elicits miosis of test pupil. | 0 | 1 | 0 | 1 |
|  | | | | | | | |

|  | | Right Eye | |  | | Left Eye | |
| --- | --- | --- | --- | --- | --- | --- | --- |
| **Relative afferent pupillary defect** | Reminds patient to continue fixating on a distant target. | 0 | 1 | - | - |
| Shines light onto non-test pupil for 3 seconds. | 0 | 1 | 0 | 1 |
| Elicits miosis of non-test pupil. | 0 | 1 | 0 | 1 |
| Rapidly swings light across nose bridge onto test pupil. | 0 | 1 | 0 | 1 |
| Shines light onto test pupil for 3 seconds. | 0 | 1 | 0 | 1 |
| Does not cause accommodation. | 0 | 1 | 0 | 1 |
|  | | | | | | | |
| **Light-near dissociation** | Offers to brighten the room lights slightly. | 0 | | | 1 | | |
| Asks patient to fixate on a distant target. | 0 | | | 1 | | |
| Asks patient to place thumb at eye level. | 0 | | | 1 | | |
| Thumb placed at half arm distance | 0 | | | 1 | | |
| Shines light from below the chin | 0 | | | 1 | | |
| Even illumination of both pupils. | 0 | | | 1 | | |
| Does not cause accommodation. | 0 | | | 1 | | |
| Asks patient to look at the near target. | 0 | | | 1 | | |
| Elicits accommodation. | 0 | | | 1 | | |
|  | | | | | | | |
| **General technique** | Ensures that patient fixates on distant target throughout. | 0 | | | 1 | | |
| Does not block patient’s fixation during examination. | 0 | | | 1 | | |

Total Score: ___ /50
